# Supplementary material
Source: PubMed Central journal article supplement (PMC3255926)
Supplement: supp_86.1.527_SupplementalTable1.pdf [file supp_86.1.527_SupplementalTable1.pdf]

Supplemental Table 1

Major characteristics of HLA ligand-containing vaccinia proteins <sup>a</sup>

| Protein     | Name                 | Expression | Signal sequence | Transmembrane domains | Encapsidated     | pI  | Mw  | PTM <sup>b</sup> | Essential to VACV |
|-------------|----------------------|------------|-----------------|-----------------------|------------------|-----|-----|------------------|-------------------|
| <b>A10L</b> | P4a precursor        | Late       | None            | 0                     | Yes, in core     | 6.1 | 102 |                  | NI <sup>c</sup>   |
| <b>A17L</b> | IMV membrane protein | Late       | Putative        | 4                     | Yes, in membrane | 4.4 | 23  | Phosphorylation  | Yes               |
| <b>A50R</b> | DNA ligase           | Early      | None            | 0                     | No               | 7.9 | 63  |                  | No                |
| <b>B8R</b>  | IFN-gamma receptor   | Early      | Putative        | 0                     | No               | 5.5 | 31  |                  | NI                |
| <b>C11R</b> | EGF growth factor    | Early      | Putative        | 1                     | No               | 6.4 | 16  |                  | NI                |
| <b>D5R</b>  | NTPase               | Early      | None            | 0                     | No               | 6.8 | 90  |                  | Yes               |
| <b>D8L</b>  | Carbonic anhydrase   | Late       | None            | 1                     | Yes, in membrane | 8.8 | 35  |                  | NI                |
| <b>K2L</b>  | Serpin 1,2,3         | Early/Late | Putative        | 0                     | No               | 9.0 | 42  |                  | NI                |

<sup>a</sup> All information was obtained from the Poxvirus Bioinformatics Resources Center (<http://www.poxvirus.org>).

<sup>b</sup> PTM, post-translational modification.

<sup>c</sup> NI, no information.
