# Supplementary material
Source: PubMed Central journal article supplement (PMC3255926)

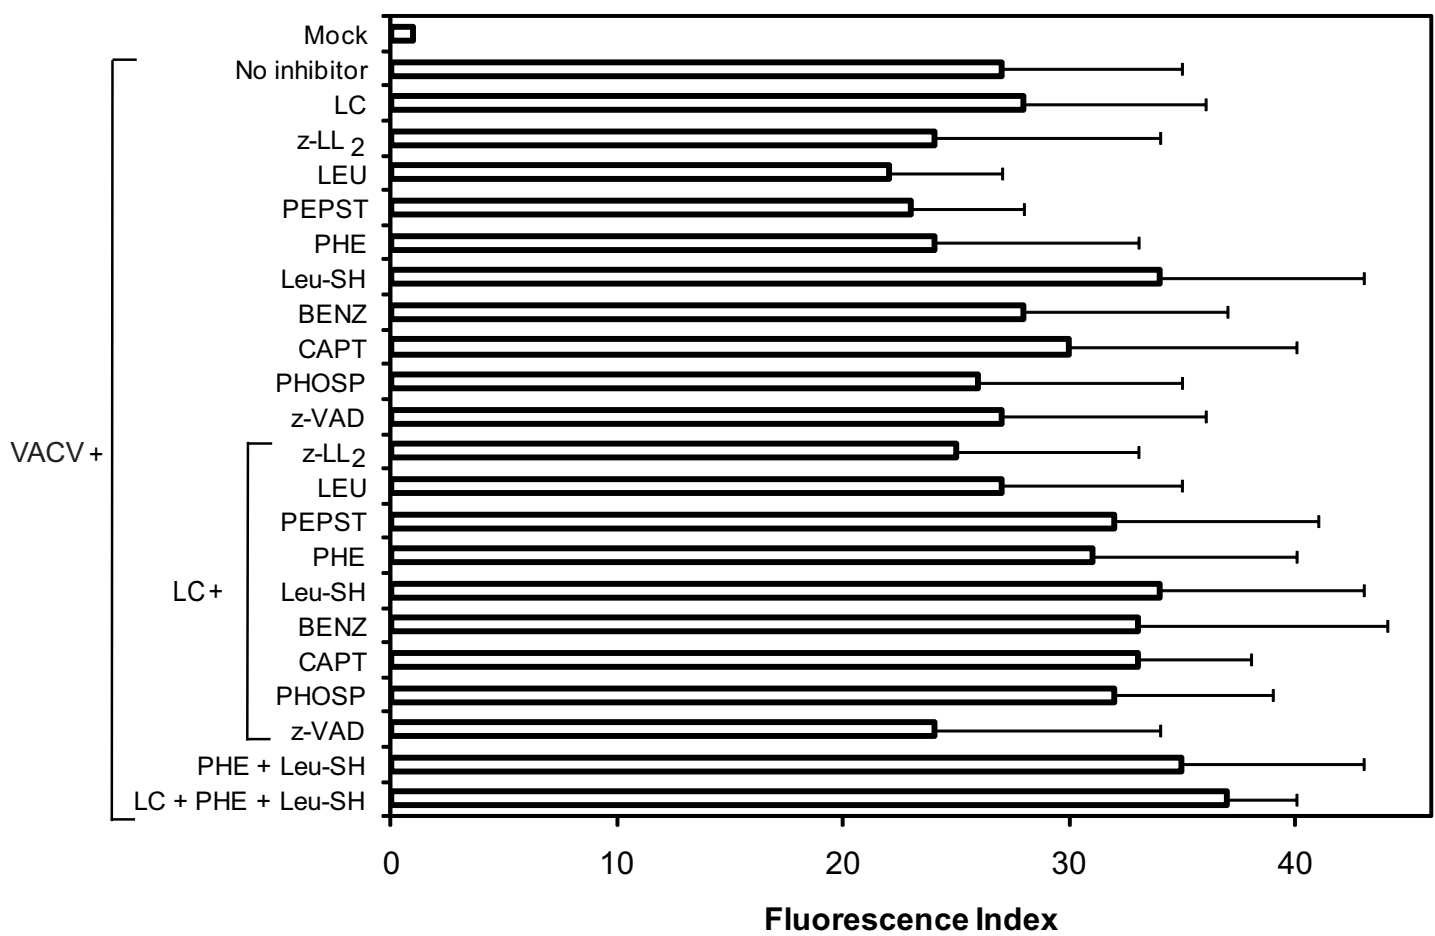

Lorente et al. Figure S1

Supplement: supp_86.1.527_SupplementalFigure1.pdf [file supp_86.1.527_SupplementalFigure1.pdf]
